# Supplementary material for: A molecular mechanism for calcium-mediated synaptotagmin-triggered exocytosis
Source: Springer Nature journal article supplement (doi:10.1038/s41594-018-0130-9), 2018-09-26
Supplement: 41594_2018_130_MOESM2_ESM.pdf [file 41594_2018_130_MOESM2_ESM.pdf]

## Reporting Summary

Nature Research wishes to improve the reproducibility of the work that we publish. This form provides structure for consistency and transparency in reporting. For further information on Nature Research policies, see [Authors & Referees](#) and the [Editorial Policy Checklist](#).

### Statistical parameters

When statistical analyses are reported, confirm that the following items are present in the relevant location (e.g. figure legend, table legend, main text, or Methods section).

n/a Confirmed

- The exact sample size ( $n$ ) for each experimental group/condition, given as a discrete number and unit of measurement
- An indication of whether measurements were taken from distinct samples or whether the same sample was measured repeatedly
- The statistical test(s) used AND whether they are one- or two-sided  
*Only common tests should be described solely by name; describe more complex techniques in the Methods section.*
- A description of all covariates tested
- A description of any assumptions or corrections, such as tests of normality and adjustment for multiple comparisons
- A full description of the statistics including central tendency (e.g. means) or other basic estimates (e.g. regression coefficient) AND variation (e.g. standard deviation) or associated estimates of uncertainty (e.g. confidence intervals)
- For null hypothesis testing, the test statistic (e.g.  $F$ ,  $t$ ,  $r$ ) with confidence intervals, effect sizes, degrees of freedom and  $P$  value noted  
*Give  $P$  values as exact values whenever suitable.*
- For Bayesian analysis, information on the choice of priors and Markov chain Monte Carlo settings
- For hierarchical and complex designs, identification of the appropriate level for tests and full reporting of outcomes
- Estimates of effect sizes (e.g. Cohen's  $d$ , Pearson's  $r$ ), indicating how they were calculated
- Clearly defined error bars  
*State explicitly what error bars represent (e.g. SD, SE, CI)*

Our web collection on [statistics for biologists](#) may be useful.

### Software and code

Policy information about [availability of computer code](#)

#### Data collection

Data was collected with custom built software that had been described previously:  
Single fusion assay: Domanska et al THE JOURNAL OF BIOLOGICAL CHEMISTRY VOL. 284, NO. 46, pp. 32158–32166, November 13, 2009.  
sdFLIC assay: Liang et al PNAS 110(48) 2013.

#### Data analysis

Software to analyze the data was custom built and had been described previously. Single fusion assay: Domanska et al THE JOURNAL OF BIOLOGICAL CHEMISTRY VOL. 284, NO. 46, pp. 32158–32166, November 13, 2009.  
sdFLIC assay: Liang et al PNAS 110(48) 2013. The FLIC fitting software is based on software that was kindly provided by Armin Lambacher and is described in detail in J. Opt. Soc. Am. B, Vol. 19, No. 6/June 2002.  
For data illustration Igor Pro 7.0 from Wavemetrics was used

For manuscripts utilizing custom algorithms or software that are central to the research but not yet described in published literature, software must be made available to editors/reviewers upon request. We strongly encourage code deposition in a community repository (e.g. GitHub). See the Nature Research [guidelines for submitting code & software](#) for further information.

## Data

Policy information about [availability of data](#)

All manuscripts must include a [data availability statement](#). This statement should provide the following information, where applicable:

- Accession codes, unique identifiers, or web links for publicly available datasets
- A list of figures that have associated raw data
- A description of any restrictions on data availability

The data that support the findings of this study are available from the corresponding author on reasonable request.

## Field-specific reporting

Please select the best fit for your research. If you are not sure, read the appropriate sections before making your selection.

Life sciences       Behavioural & social sciences       Ecological, evolutionary & environmental sciences

For a reference copy of the document with all sections, see [nature.com/authors/policies/ReportingSummary-flat.pdf](https://nature.com/authors/policies/ReportingSummary-flat.pdf)

## Life sciences study design

All studies must disclose on these points even when the disclosure is negative.

Sample size

Results are reported as mean from repeated experiments. The number of experiments, mean and standard errors for all experiments are reported in tables as Supplementary Tables.

For fusion assays, we also report the total number of recorded events.

SDFLIC statistics is explained in detail in the Methods part. Briefly, results are reported as mean +/-std from repeats. Each repeat includes 4-5 acquired images from one sample. On each image ~100 areas were analyzed. The distribution of results from one (example) sample are shown as Supplementary Figures for all conditions.

Data exclusions

No data was excluded.

Replication

See above. All experiments were repeated at least 3 times. Number of repeats are listed in Extended Data tables.

Randomization

Experimental conditions are defined in the paper. No randomization or further allocation was necessary.

Blinding

Experimental data was analyzed by software. No data was excluded, no blinding was necessary.

## Reporting for specific materials, systems and methods

### Materials & experimental systems

- |                                     |                                                                 |
|-------------------------------------|-----------------------------------------------------------------|
| n/a                                 | Involvement in the study                                        |
| <input type="checkbox"/>            | <input checked="" type="checkbox"/> Unique biological materials |
| <input checked="" type="checkbox"/> | <input type="checkbox"/> Antibodies                             |
| <input type="checkbox"/>            | <input checked="" type="checkbox"/> Eukaryotic cell lines       |
| <input checked="" type="checkbox"/> | <input type="checkbox"/> Palaeontology                          |
| <input checked="" type="checkbox"/> | <input type="checkbox"/> Animals and other organisms            |
| <input checked="" type="checkbox"/> | <input type="checkbox"/> Human research participants            |

### Methods

- |                                     |                                                 |
|-------------------------------------|-------------------------------------------------|
| n/a                                 | Involvement in the study                        |
| <input checked="" type="checkbox"/> | <input type="checkbox"/> ChIP-seq               |
| <input checked="" type="checkbox"/> | <input type="checkbox"/> Flow cytometry         |
| <input checked="" type="checkbox"/> | <input type="checkbox"/> MRI-based neuroimaging |

## Unique biological materials

Policy information about [availability of materials](#)

Obtaining unique materials      All unique materials are available from the authors upon reasonable request.

## Eukaryotic cell lines

---

Policy information about [cell lines](#)

Cell line source(s)

Rat pheochromocytoma PC12 cell line obtained from Edwin Chapman, University of Wisconsin.

Authentication

Use of amperometry to detect depolarization-dependent noradrenalin secretion (Liu et al (2005) Mol. Biol. Cell 16: 4463-4472 PMID 9487127); use of cell fractionation to purify large dense core vesicles containing secretogranin II, a known stored secretory product (Liu et al (2002) Mol. Biol. Cell 13: 4266-4278 PMID 12475951); use of electron microscopy to analyze compound exocytosis of large dense core vesicles (Zhang et al (2011) Traffic 12: 600-614 PMID 21272170).

Mycoplasma contamination

Cell lines routine tested for mycoplasma 2002-2017

Commonly misidentified lines  
(See [ICLAC](#) register)

No commonly misidentified cell lines were used in this study.
